# Supplementary material for: The Influence of the Modulation Index on Frequency-Modulated Steady-State Visual Evoked Potentials
Source: Front Hum Neurosci. 2022 Mar 10;16:859519. doi: 10.3389/fnhum.2022.859519 (PMC8959979; doi:10.3389/fnhum.2022.859519)
Supplement: Supplementary file 2 [file Table_1.XLSX]

## Sheet: Tabelle1
Mean				Standard Deviation
Modulation Index	Flicker Intensity	Comfort		Modulation Index	Flicker Intensity	Comfort
0.25	1.36	4.40		0.25	0.357	0.492
0.5	2.48	3.71		0.5	0.688	0.583
0.78	3.19	3.36		0.78	0.792	0.577
1.14	3.52	3		1.14	0.502	0.641
ANOVA Intensity
Error: Subject
	Df	Sum Sq	Mean Sq
Residuals	13	12.48	0.9599
Error: Subject:MI
	Df	Sum Sq	Mean Sq	F Value	Pr(>F)
MI	3	38.59	12.864	74.13	3.64e-16	***
Residuals	39	6.77	0.174
---
Signif. codes: 0 ‘***’ 0.001 ‘**’ 0.01 ‘*’ 0.05 ‘.’ 0.1 ‘ ’ 1
	Pairwise comparisons using paired t tests
data: Intensity and MI
	0.25	0.5	0.78
0.5	3.2e-05	-	-
0.78	1.5e-06	0.00049	-
1.14	2.2e-09	8.6e-06	0.03301
P value adjustment method: fdr
ANOVA Comfort
Error: Subject
	Df	Sum Sq	Mean Sq
Residuals	13	8.484	0.6526
Error: Subject:MI
	Df	Sum Sq	Mean Sq	F Value	Pr(>F)
MI	3	15.095	5.032	22.46	1.3e-08	***
Residuals	39	8.738	0.224
---
Signif. codes: 0 ‘***’ 0.001 ‘**’ 0.01 ‘*’ 0.05 ‘.’ 0.1 ‘ ’ 1
	Pairwise comparisons using paired t tests
data: Comfort and MI
	0.25	0.5	0.78
0.5	0.00026	-	-
0.78	0.00042	0.08228	-
1.14	0.00017	0.00218	0.01855
P value adjustment method: fdr
